# Supplementary material
Source: HighWire-hosted journal article supplement (https://www.jrheum.org/highwire/filestream/42148/field_highwire_adjunct_files/0/220125DataSuppl.pdf)
Supplement: 220125DataSuppl.pdf [file 220125DataSuppl.pdf]

**Supplemental Figure 1.** Summary of Selected Global Clinical Practice Guidelines for IAHA for Treating OA Knee Pain

| Professional Societies                                                    | Geography                                                                           | Year      | Recommendation or Guideline                                                                                                                           |
|---------------------------------------------------------------------------|-------------------------------------------------------------------------------------|-----------|-------------------------------------------------------------------------------------------------------------------------------------------------------|
| American Academy of Family Physicians (AAFP)                              |    | 2012 [1]  | Recommended in severe OA when other treatment options are not effective.                                                                              |
| American Academy of Orthopaedic Surgeons (AAOS)                           |    | 2021 [2]  | Do not recommend due to a low likelihood that an appreciable number of patients achieved clinically important benefits based on published literature. |
| American College of Rheumatology (ACR)                                    |    | 2019 [3]  | Conditionally recommended against.                                                                                                                    |
| American Medical Society for Sports Medicine (AMSSM)                      |    | 2016 [4]  | Recommended in patients who meet OMERACT-OARS criteria.                                                                                               |
| Arthroscopy Association of Canada (AAC)                                   |    | 2019 [5]  | Recommended in patients with mild to moderate OA.                                                                                                     |
| Chinese Medical Association (CMA)                                         |    | 2018 [6]  | Recommended as a safe and effective treatment for mild to moderate knee OA.                                                                           |
| European League Against Rheumatism (EULAR)                                |    | 2003 [7]  | Acknowledgement of potential benefits of IAHA use in treating OA patients.                                                                            |
| European Society Clinical & Economic Aspects of Osteoporosis & OA (ESCEO) |    | 2016 [8]  | Recommend in mild to moderate knee OA; severe cases if surgery is contraindicated or desire to delay surgery.                                         |
| German Society for Orthopedics and Orthopedic Surgery (DGOOC)             |    | 2018 [9]  | Recommended if NSAIDs are not effective or contraindicated.                                                                                           |
| Osteoarthritis Research Society International (OARS)                      |    | 2019 [10] | Conditional recommendation in favor for knee-only OA; not appropriate: multiple-joint OA.                                                             |
| Turkish League Against Rheumatism (TLAR)                                  |    | 2018 [11] | Recommended in patients with moderate to severe symptoms but some uncertainty in the current evidence.                                                |
| PanAmerican League of Associations for Rheumatology (PANLAR)              |    | 2016 [12] | Recommended for patients with moderate to severe symptoms.                                                                                            |
| Spanish Society of Rheumatology (SER)                                     |    | 2005 [13] | Recommended as an effective treatment for knee OA.                                                                                                    |
| Consensus, Agency Meta-analysis, and Healthcare Policy                    | Geography                                                                           | Year      | Recommendation or Guideline                                                                                                                           |
|                                                                           |    | 2007 [14] | Recommendation uncertain - variability in evidence; insufficient evidence to support disease modification.                                            |
| Agency for Healthcare Research and Quality (AHRQ)                         |   | 2015 [15] | Comparative effectiveness: IA treatment including IAHA have a 2-3 times greater clinical effect size than NSAIDs.                                     |
| Center for Medicare and Medicaid Services (CMS) - Coverage Policy         |  | 2020 [16] | Medicare considers IAHA medically necessary (medical criteria), only covers knee and course every 6 mo.                                               |
| Cochrane Collaboration                                                    |  | 2006 [17] | HA showed a significant clinical benefit at 4-26 weeks.                                                                                               |
| European Experts on OA (EUROVISCO)                                        |  | 2021 [18] | Recommended as a safe and effective treatment for knee OA.                                                                                            |
| Malaysia Ministry of Health (MOH)                                         |  | 2017 [19] | Recommended where general measures or systemic therapies have failed or are contraindicated.                                                          |
| Mexican Consensus Meeting (MCM)                                           |  | 2018 [20] | Recommended as a safe and effective treatment; can reduce direct and indirect costs associated with the OA.                                           |
| National Institute for Health and Care Excellence (NICE)                  |  | 2014 [21] | Not recommended due to uncertainty in current evidence, although IAHA does not appear to be cost effective.                                           |
| Veterans Affairs/Department of Defense (VA/DoD)                           |  | 2014 [22] | Uncertain recommendation, although suggestion of potential use if other treatments are not effective.                                                 |

IAHA, intra-articular hyaluronic acid; NSAID, nonsteroidal anti-inflammatory drug; OA, osteoarthritis; OMERACT, Outcome Measures in Rheumatoid Arthritis Clinical Trials.

## Supplemental References

### Select Global Clinical Practice Guidelines for IAHA for Treating OA Knee Pain

1. Sinusas K. Osteoarthritis: diagnosis and treatment. *Am Fam Physician* 2012;85:49-56.
2. American Academy of Orthopaedic Surgeons. Management of Osteoarthritis of the Knee (NonArthroplasty) Evidence-Based Clinical Practice Guideline. [Internet. Accessed October 10, 2021.] Available from: <https://www.aaos.org/OAK3CPG>
3. Kolasinski SL, Neogi T, Hochberg MC, et al. 2019 American College of Rheumatology/Arthritis Foundation Guideline for the Management of Osteoarthritis of the Hand, Hip, and Knee. *Arthritis Rheumatol* 2020;72:220-33.
4. Trojian TH, Concoff AL, Joy SM, Hatzenbuehler JR, Saulsberry WJ, Coleman CI. AMSSM Scientific Statement Concerning Viscosupplementation Injections for Knee Osteoarthritis: Importance for Individual Patient Outcomes. *Clin J Sport Med* 2016;26:1-11.
5. Arthroscopy Association of Canada, Kopka M, Sheehan B, et al. Arthroscopy Association of Canada Position Statement on Intra-articular Injections for Knee Osteoarthritis. *Orthop J Sports Med* 2019;7:2325967119860110.
6. Huang D, Liu Y-Q, Liang L-S, et al. The Diagnosis and Therapy of Degenerative Knee Joint Disease: Expert Consensus from the Chinese Pain Medicine Panel. *Pain Res Manag* 2018;2018:2010129.

7. Jordan KM, Arden NK, Doherty M, et al. EULAR Recommendations 2003: an evidence based approach to the management of knee osteoarthritis: Report of a Task Force of the Standing Committee for International Clinical Studies Including Therapeutic Trials (ESCISIT). *Ann Rheum Dis* 2003;62:1145-55.
8. Bruyère O, Cooper C, Pelletier J-P, et al. A consensus statement on the European Society for Clinical and Economic Aspects of Osteoporosis and Osteoarthritis (ESCEO) algorithm for the management of knee osteoarthritis-From evidence-based medicine to the real-life setting. *Semin Arthritis Rheum* 2016;45:S3-11.
9. Steinmeyer J, Bock F, Stöve J, Jerosch J, Flechtenmacher J. Pharmacological treatment of knee osteoarthritis: Special considerations of the new German guideline. *Orthop Rev (Pavia)* 2018;10:7782.
10. Bannuru RR, Osani MC, Vaysbrot EE, et al. OARSI guidelines for the non-surgical management of knee, hip, and polyarticular osteoarthritis. *Osteoarthritis Cartilage* 2019;27:1578-89.
11. Tuncer T, Cay FH, Altan L, et al. 2017 update of the Turkish League Against Rheumatism (TLAR) evidence-based recommendations for the management of knee osteoarthritis. *Rheumatol Int* 2018;38:1315-31.
12. Rillo O, Riera H, Acosta C, et al. PANLAR Consensus Recommendations for the Management in Osteoarthritis of Hand, Hip, and Knee. *J Clin Rheumatol* 2016;22(7):345-54.
13. Blanco FJ, Panel de Expertos de la Sociedad Espanola de R. Primer documento de consenso de la Sociedad Española de Reumatología sobre el tratamiento farmacológico de la artrosis de rodilla. *Reumatol Clin* 2005;1:38-48.

14. Samson DJ, Grant MD, Ratko TA, Bonnell CJ, Ziegler KM, Aronson N. Treatment of primary and secondary osteoarthritis of the knee. *Evid Rep Technol Assess (Full Rep)* 2007;(157):1-157.

15. Bannuru RR, Schmid CH, Kent DM, Vaysbrot EE, Wong JB, McAlindon TE. Comparative effectiveness of pharmacologic interventions for knee osteoarthritis: a systematic review and network meta-analysis. *Ann Intern Med* 2015;162:46-54.

16. Center for Medicare and Medicare Services. Local Coverage determination (LCD): Hyaluronan Acid Therapy for Osteoarthritis of the Knee (L35427). [Internet. Accessed October 14, 2021.] Available from: <https://www.cms.gov/medicare-coverage-database/view/lcd.aspx?LCDId=35427>

17. Bellamy N, Campbell J, Robinson V, Gee T, Bourne R, Wells G. Viscosupplementation for the treatment of osteoarthritis of the knee. *Cochrane Database Syst Rev* 2006;2006:CD005321.

18. Conrozier T, Raman R, Chevalier X, et al. Viscosupplementation for the treatment of osteoarthritis. The contribution of EUROVISCO group. *Ther Adv Musculoskel Dis* 2021;13:1759720X211018605.

19. Malaysia Health Technology Assessment Section (MaHTAS). Ministry of Health Malaysia: Management of Osteoarthritis. [Internet. Accessed October 10, 2021.] Available from: <https://www.moh.gov.my/>

20. Espinosa-Morales R, Alcántar-Ramírez J, Arce-Salinas CA, et al. Multidisciplinary meeting of experts for diagnosis and treatment of osteoarthritis. Up-to-date based on evidence. *Med Interna Méx* 2018;34:443-76.

21. National Clinical Guideline Centre (UK). Osteoarthritis: Care and Management in Adults. National Institute for Health and Care Excellence (UK). [Internet. Accessed October 10, 2021.] Available from:

[https://www.ncbi.nlm.nih.gov/books/NBK248069/pdf/Bookshelf\\_NBK248069.pdf](https://www.ncbi.nlm.nih.gov/books/NBK248069/pdf/Bookshelf_NBK248069.pdf)

22. Department of Veterans Affairs, Department of Defense. Va/DoD Clinical Practice Guideline for the Non-Surgical Management of Osteoarthritis of the Hip and Knee Osteoarthritis. Version 1.0. [Internet. Accessed October 10, 2021.]

Available from: <https://www.healthquality.va.gov/guidelines/CD/OA/VADoDOACPGFINAL090214.pdf>
